# Supplementary material
Source: publisher figshare collection journal article supplement (https://acs.figshare.com/ndownloader/files/4848166)
Supplement: Supplementary file 1 [file 4848166]

# Supporting Information

## Terpenoid Oligomers of Dammar Resin

*Ilaria Bonaduce,<sup>†\*</sup> Francesca Di Girolamo,<sup>†</sup> Iacopo Corsi,<sup>†</sup> Ilaria Degano,<sup>†</sup> Maria Rosaria Tiné,<sup>†</sup> and Maria Perla Colombini<sup>†,#</sup>*

<sup>†</sup> Dipartimento di Chimica e Chimica Industriale, Università di Pisa, via Moruzzi 3, 56124 Pisa, Italy

<sup>#</sup> ICVBC-CNR, Via Madonna del Piano, 50019 Sesto Fiorentino, Florence, Italy

Contents: FIA/ESI mass spectra of five triterpenoid standard compounds (lupeol, lupenone, betulin, betulinic acid, hydroxydammarone and oleanolic acid) and tandem mass spectra of relevant  $m/z$  values

The FIA/ESI mass spectra of five triterpenoid standard compounds (lupeol, lupenone, betulin, betulinic acid, hydroxydammarone and oleanolic acid) are reported in Figure S1.

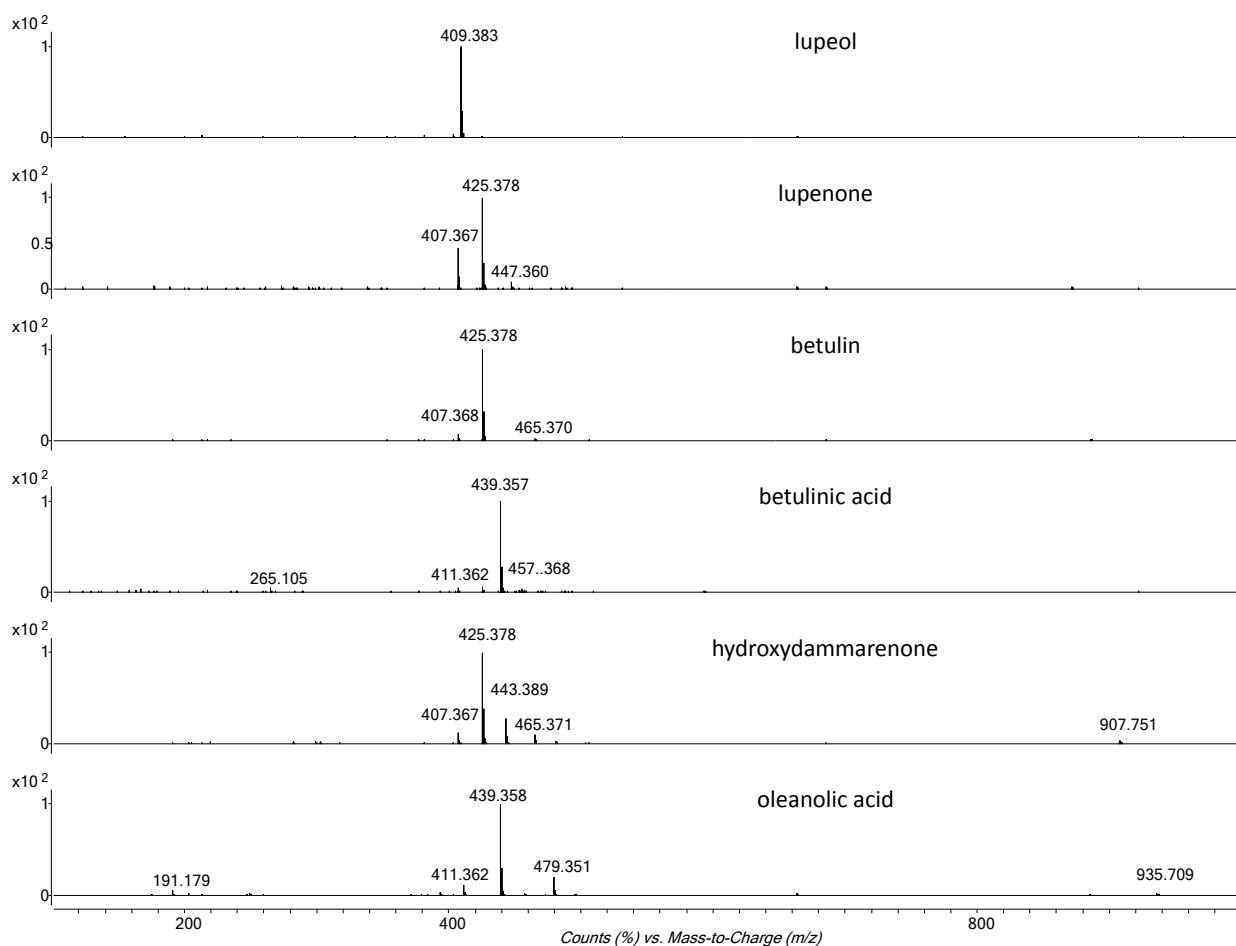

Figure S1. FIA/ESI mass spectra of the CH<sub>2</sub>Cl<sub>2</sub>- MeOH solutions of five triterpenoid standards

All the detected peaks correspond to singly charged ions. Possible assignments for the main peaks observed in the FIA/ESI mass spectra are reported in Table 1.

Table S1. Possible Assignments for the Main Peaks Observed in the FIA/ESI Mass Spectra of the CH<sub>2</sub>Cl<sub>2</sub>- MeOH Solutions of Five Triterpenoid Standards

| compound<br>(molecular<br>formula)                                           | molecular structure                                                                 | assignment                                                                                                                                                                                                                                                                                                                                                                                  | m/z                                                 | theoretical<br>m/z                                       | mass<br>accuracy<br>(ppm)          |
|------------------------------------------------------------------------------|-------------------------------------------------------------------------------------|---------------------------------------------------------------------------------------------------------------------------------------------------------------------------------------------------------------------------------------------------------------------------------------------------------------------------------------------------------------------------------------------|-----------------------------------------------------|----------------------------------------------------------|------------------------------------|
| lupeol<br>(C <sub>30</sub> H <sub>50</sub> O)                                | 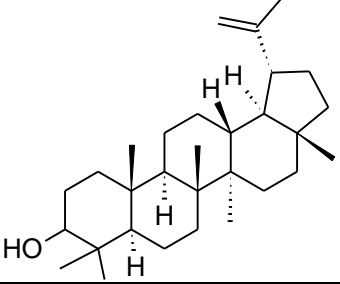   | [C <sub>30</sub> H <sub>50</sub> O - H <sub>2</sub> O+H] <sup>+</sup>                                                                                                                                                                                                                                                                                                                       | 409.383                                             | 409.3834                                                 | -1.0                               |
| lupenone<br>(C <sub>30</sub> H <sub>48</sub> O)                              |   | [C <sub>30</sub> H <sub>48</sub> O - H <sub>2</sub> O+H] <sup>+</sup><br>[C <sub>30</sub> H <sub>48</sub> O + H] <sup>+</sup><br>[C <sub>30</sub> H <sub>48</sub> O+ Na] <sup>+</sup>                                                                                                                                                                                                       | 407.367<br>425.378<br>447.360                       | 407.3672<br>425.3783<br>447.3602                         | -0.5<br>-0.7<br>-0.6               |
| betulin<br>(C <sub>30</sub> H <sub>50</sub> O <sub>2</sub> )                 |  | [C <sub>30</sub> H <sub>50</sub> O <sub>2</sub> - 2H <sub>2</sub> O+H] <sup>+</sup><br>[C <sub>30</sub> H <sub>50</sub> O <sub>2</sub> - H <sub>2</sub> O+H] <sup>+</sup><br>[C <sub>30</sub> H <sub>50</sub> O <sub>2</sub> + H] <sup>+</sup><br>[C <sub>30</sub> H <sub>50</sub> O <sub>2</sub> + Na] <sup>+</sup>                                                                        | 407.368<br>425.378<br>443.388<br>465.370            | 407.3672<br>425.3783<br>443.3884<br>465.3703             | -2.0<br>-0.7<br>-0.9<br>-0.6       |
| betulinic acid<br>(C <sub>30</sub> H <sub>48</sub> O <sub>3</sub> )          |  | [C <sub>30</sub> H <sub>48</sub> O <sub>3</sub> - COOH] <sup>+</sup><br>[C <sub>30</sub> H <sub>48</sub> O <sub>3</sub> - H <sub>2</sub> O+H] <sup>+</sup><br>[C <sub>30</sub> H <sub>48</sub> O <sub>3</sub> + H] <sup>+</sup><br>[C <sub>30</sub> H <sub>48</sub> O <sub>3</sub> + Na] <sup>+</sup>                                                                                       | 411.362<br>439.358<br>457.368<br>479.349            | 411.3626<br>439.3576<br>457.3682<br>479.3501             | -1.4<br>0.9<br>-0.4<br>-2.3        |
| hydroxy-<br>dammarenone<br>(C <sub>30</sub> H <sub>50</sub> O <sub>2</sub> ) |  | [C <sub>30</sub> H <sub>50</sub> O <sub>2</sub> - 2H <sub>2</sub> O+H] <sup>+</sup><br>[C <sub>30</sub> H <sub>50</sub> O <sub>2</sub> - H <sub>2</sub> O+H] <sup>+</sup><br>[C <sub>30</sub> H <sub>50</sub> O <sub>2</sub> + H] <sup>+</sup><br>[C <sub>30</sub> H <sub>50</sub> O <sub>2</sub> + Na] <sup>+</sup><br>[C <sub>60</sub> H <sub>100</sub> O <sub>4</sub> + Na] <sup>+</sup> | 407.367<br>425.378<br>443.389<br>465.370<br>907.751 | 407.3672<br>425.3778<br>443.3884<br>465.3703<br>907.7519 | -0.5<br>-0.7<br>1.3<br>-0.6<br>1.0 |

|                                                                                                                           |                                  |         |          |      |
|---------------------------------------------------------------------------------------------------------------------------|----------------------------------|---------|----------|------|
| oleanolic acid<br>( $C_{30}H_{48}O_3$ ) 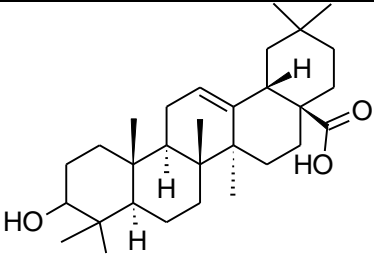 | $[C_{30}H_{48}O_3 - COOH]^+$     | 411.362 | 411.3626 | -1.4 |
|                                                                                                                           | $[C_{30}H_{48}O_3 - H_2O + H]^+$ | 439.357 | 439.3576 | -1.3 |
|                                                                                                                           | $[C_{30}H_{48}O_3 + H]^+$        | 457.368 | 457.3682 | -0.4 |
|                                                                                                                           | $[C_{30}H_{48}O_3 + Na]^+$       | 479.350 | 479.3501 | -0.2 |
|                                                                                                                           | $[C_{60}H_{96}O_6 + Na]^+$       | 935.709 | 935.7104 | -1.5 |

The mixture of hydroxydammarone and oleanolic acid (Figure S2 ) shows the same peaks as those observed when the triterpenoids were analysed separately, plus one ion at  $m/z$  931.731 which is consistent with the sodiated form of a species of molecular formula  $C_{60}H_{98}O_5$  (theoretical  $m/z$  931.7301, mass accuracy 1.0 ppm)

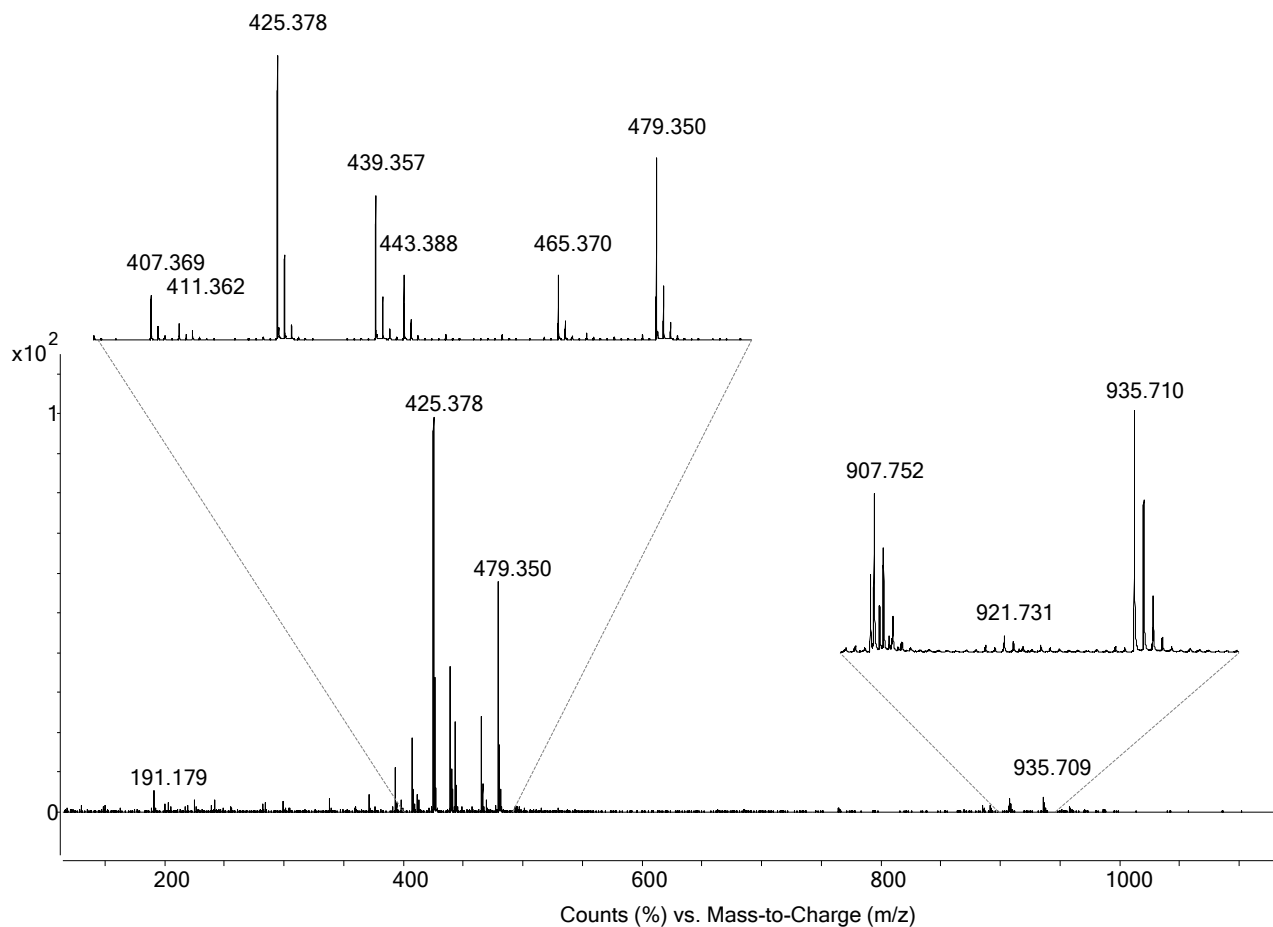

Figure S2. FIA/ESI mass spectrum of the  $\text{CH}_2\text{Cl}_2$ - MeOH solution of a mixture of hydroxydammarenone and oleanolic acid

In order to investigate the structure of the species responsible for the signals at  $m/z$  907.751,  $m/z$  921.731 and  $m/z$  935.709, MS/MS experiments were carried out, and relative tandem mass spectra are shown in Figure S3.

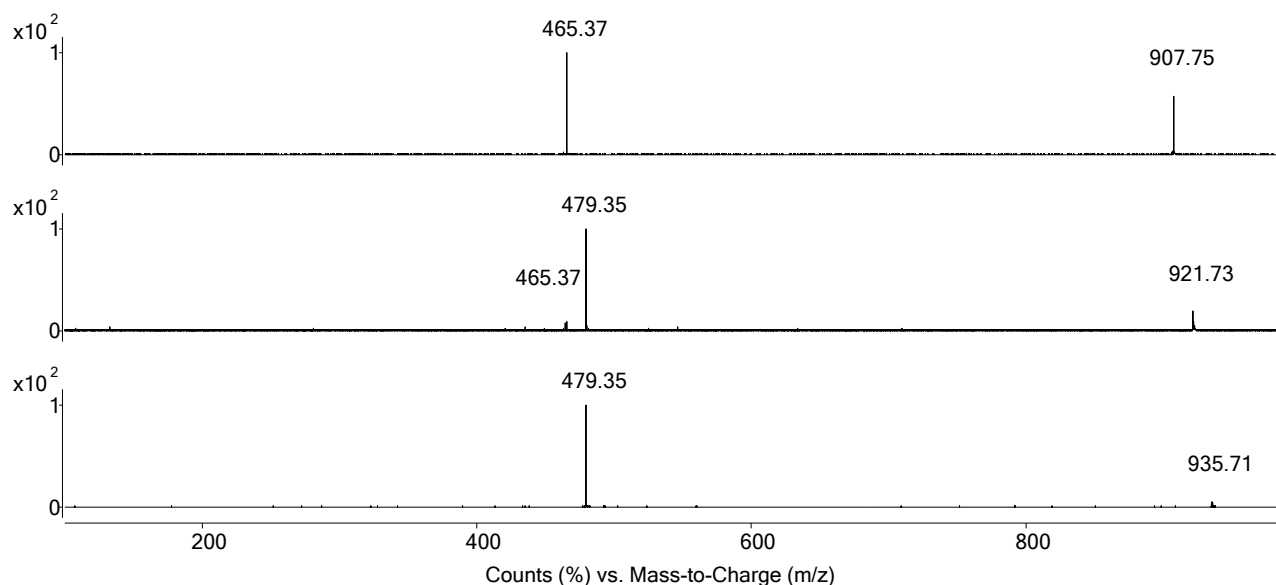

Figure S3. Tandem mass spectra of the ions at m/z 907.751, m/z 921.731 and m/z 935.709. The voltage used for CID was 30 V.

The spectra are dominated by signals that can be assigned to sodiated pseudomolecular ions of triterpenoids, and the difference between the precursor ion and the fragments is compatible with the neutral loss of a triterpenoid molecule. In particular, the ion at m/z 907.751 can be ascribed to the sodiated adduct of two hydroxydammarenone molecules, the ion at m/z 935.709 to the sodiated adduct of two oleanolic acid molecule, and the ion at m/z 921.731 to the sodiated adduct of a hydroxydammarenone and oleanolic acid molecule.
